# Supplementary material
Source: Research Square preprint supplement (doi:10.21203/rs.3.rs-9203584/v1)
Supplement: Supplementary file 1 [file 28c88b75e5c5c1a1420b4796.pdf]

Supplementary Information for  
**Emulating absent land processes reduces carbon budgets in CMIP6  
models**

Spencer K. Liddicoat\*, Chris D. Jones, Lina M. Mercado, Eddy Robertson,  
Stephen Sitch, Andy Wiltshire

\*Corresponding author: [spencer.liddicoat@metoffice.gov.uk](mailto:spencer.liddicoat@metoffice.gov.uk)

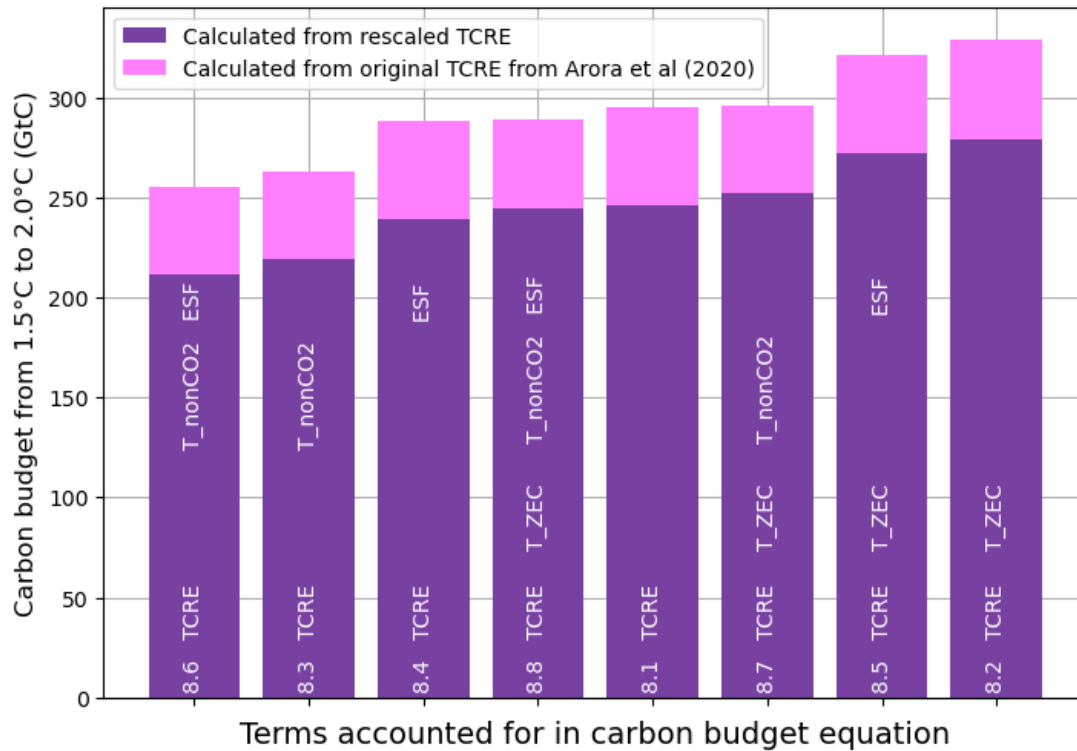

**Supplementary Figure 1: Bar chart showing the average carbon budget from 1.5°C to 2°C of 11 CMIP6 ESMs.** Calculated from Equations 8.1 to 8.8, using the original TCRE from Arora et al (2020)<sup>1</sup> (lilac bars) and the TCRE rescaled to account for absent processes (purple bars). Bar labels show equation number and the adjustment terms included in the calculation of the carbon budget: T\_nonCO2 = warming due to non-CO<sub>2</sub> forcing, T\_ZEC is zero emissions commitment (ZEC25) from MacDougall et al (2020)<sup>2</sup> where available; ESF is emissions due to Earth system feedbacks not accounted for in the calculation of TCRE.

|                   | Nitrogen limitation | Dynamic vegetation | Fire-vegetation interactions | Interactive BVOC emissions | Interactive CH <sub>4</sub> cycle and emissions from wetlands | Spatially varying diffuse fraction of photo-synthetically active radiation | Overall scaling factor for each ESM |       |
|-------------------|---------------------|--------------------|------------------------------|----------------------------|---------------------------------------------------------------|----------------------------------------------------------------------------|-------------------------------------|-------|
|                   |                     |                    |                              |                            |                                                               |                                                                            | TCRE                                | CE    |
| ACCESS-ESM1.5     | Yes                 | No                 | No                           | No                         | No                                                            | No                                                                         | 1.251                               | 0.939 |
| BCC-CSM2-MR       | No                  | No                 | No                           | No                         | No                                                            | No                                                                         | 1.348                               | 0.853 |
| CanESM5           | No                  | No                 | No                           | No                         | No                                                            | No                                                                         | 1.348                               | 0.853 |
| CESM2             | Yes                 | No                 | Yes                          | No                         | No                                                            | Yes                                                                        | 1.021                               | 1.062 |
| CNRM-ESM2-1       | No                  | No                 | Yes                          | No                         | No                                                            | No                                                                         | 1.203                               | 0.959 |
| GFDL-ESM4         | No                  | Yes                | Yes                          | Yes                        | No                                                            | Yes                                                                        | 1.148                               | 0.912 |
| IPSL-CM6A-LR      | No                  | No                 | No                           | No                         | No                                                            | No                                                                         | 1.348                               | 0.853 |
| MIROC-ES2L        | Yes                 | No                 | No                           | No                         | No                                                            | No                                                                         | 1.251                               | 0.939 |
| MPI-ESM1.2-LR     | Yes                 | Yes                | Yes                          | No                         | No                                                            | No                                                                         | 1.121                               | 0.991 |
| NorESM2-LM        | Yes                 | No                 | Yes                          | Yes                        | No                                                            | Yes                                                                        | 1.035                               | 1.054 |
| UKESM1-0-LL       | Yes                 | Yes                | No                           | Yes                        | No                                                            | No                                                                         | 1.281                               | 0.876 |
| <i>ukesm-ctrl</i> | Yes                 | Yes                | No                           | No                         | No                                                            | No                                                                         | 1.267                               | 0.884 |

**Supplementary Table 1: ESM-specific scaling factors and the processes included or not (Yes/No) in each model.** The final two columns contain the scaling factors by which the original TCRE and Cumulative Emissions from Arora et al (2020)<sup>1</sup> are multiplied to account for the processes not represented in each model, as shown in columns 2 to 7. Included are 11 CMIP6 models, and the control configuration of the UKESM process ensemble, *ukesm-ctrl*.

| Earth System Model                 | TCRE (°C/EgC) | Rescaled TCRE (°C/EgC) |                | Cumulative Emissions (GtC) | Rescaled Cumulative Emissions (GtC) |              |
|------------------------------------|---------------|------------------------|----------------|----------------------------|-------------------------------------|--------------|
|                                    |               |                        |                |                            |                                     |              |
| BCC-CSM2-MR                        | 1.32          | 1.78                   | +34.8%         | 1291                       | 1101                                | -14.7%       |
| NorESM2-LM                         | 1.32          | 1.37                   | +3.5%          | 1075                       | 1133                                | +5.4%        |
| MIROC-ES2L                         | 1.39          | 1.74                   | +25.1%         | 1135                       | 1066                                | -6.1%        |
| GFDL4-ESM4                         | 1.45          | 1.66                   | +14.8%         | 1066                       | 972                                 | -8.8%        |
| CNRM-ESM2-1                        | 1.63          | 1.96                   | +20.3%         | 1124                       | 1078                                | -4.1%        |
| MPI-ESM1.2-LR                      | 1.65          | 1.85                   | +12.1%         | 1127                       | 1117                                | -0.9%        |
| ACCESS-ESM1.5                      | 2.02          | 2.53                   | +25.1%         | 1064                       | 1000                                | -6.0%        |
| CanESM5                            | 2.09          | 2.82                   | +34.8%         | 1214                       | 1035                                | -14.7%       |
| CESM2                              | 2.13          | 2.17                   | +2.1%          | 1073                       | 1139                                | +6.2%        |
| IPSL-CM6A-LR                       | 2.13          | 2.87                   | +34.8%         | 1107                       | 944                                 | -14.7%       |
| UKESM1-0-LL                        | 2.30          | 2.95                   | +28.1%         | 1054                       | 924                                 | -12.3%       |
| CMIP6 Mean ± Std Dev               | 1.77 ± 0.36   | 2.15 ± 0.52            | +21.4% ± 11.4% | 1121 ± 70                  | 1046 ± 73                           | -6.7% ± 7.3% |
| <i>ukesm-allprocs</i> , this study | <b>3.13</b>   | -                      | -              | <b>952</b>                 | -                                   | -            |
| <i>ukesm-ctrl</i> , this study     | 2.48          | <b>3.14</b>            | -              | 1077                       | <b>952</b>                          | -            |

**Supplementary Table 2: Table of original and rescaled TCRE and cumulative emissions to 2xCO<sub>2</sub> for 11 CMIP6 ESMs.** The last two rows show the same figures, where applicable, for the control (*ukesm-ctrl*) and ‘all processes’ (*ukesm-allprocs*) configurations of UKESM. The rescaled *ukesm-ctrl* entries, and those from *ukesm-allprocs* they are intended to reconstruct, are both highlighted in bold. Percentages are the percentage change after rescaling.

| Equation used to calculate carbon budget from 1.5°C to 2°C                              | $CB_{1.5\_2.0}$ using original <sup>9</sup> TCRE (GtC) | $CB_{1.5\_2.0}$ using rescaled TCRE (GtC) | Reduction in $CB_{1.5\_2.0}$ after rescaling TCRE (%) |
|-----------------------------------------------------------------------------------------|--------------------------------------------------------|-------------------------------------------|-------------------------------------------------------|
| 8.1: $CB_{1.5\_2.0} = (2.0^{\circ}C - 1.5^{\circ}C)/TCRE$                               | 295                                                    | 246                                       | 16.5                                                  |
| 8.2: $CB_{1.5\_2.0} = (2.0^{\circ}C - 1.5^{\circ}C - T_{ZEC})/TCRE$                     | 329                                                    | 279                                       | 14.7                                                  |
| 8.3: $CB_{1.5\_2.0} = (2.0^{\circ}C - 1.5^{\circ}C - T_{nonCO_2})/TCRE$                 | 263                                                    | 219                                       | 16.5                                                  |
| 8.4: $CB_{1.5\_2.0} = (2.0^{\circ}C - 1.5^{\circ}C)/TCRE - ESF$                         | 288                                                    | 239                                       | 16.9                                                  |
| 8.5: $CB_{1.5\_2.0} = (2.0^{\circ}C - 1.5^{\circ}C - T_{ZEC})/TCRE - ESF$               | 321                                                    | 272                                       | 15.0                                                  |
| 8.6: $CB_{1.5\_2.0} = (2.0^{\circ}C - 1.5^{\circ}C - T_{nonCO_2})/TCRE - ESF$           | 255                                                    | 212                                       | 17.0                                                  |
| 8.7: $CB_{1.5\_2.0} = (2.0^{\circ}C - 1.5^{\circ}C - T_{nonCO_2} - T_{ZEC})/TCRE$       | 296                                                    | 252                                       | 14.6                                                  |
| 8.8: $CB_{1.5\_2.0} = (2.0^{\circ}C - 1.5^{\circ}C - T_{nonCO_2} - T_{ZEC})/TCRE - ESF$ | 289                                                    | 245                                       | 14.9                                                  |
| <i>Mean and standard deviation</i>                                                      | 292±24                                                 | 245±21                                    | 16.0±0.8                                              |

**Supplementary Table 3: Carbon emissions budget from 1.5°C to 2°C,  $CB_{1.5\_2.0}$ .** Columns 2 and 3 show  $CB_{1.5\_2.0}$  calculated from the CMIP6 ESMs’ original (Arora et al (2020))<sup>1</sup> and rescaled TCRE respectively, for each of Equations 8.1 to 8.8, as shown in the first column.  $CB_{1.5\_2.0}$  is the carbon budget from 1.5°C to 2°C,  $T_{ZEC}$  is the committed warming evaluated 25 years after the cessation of CO<sub>2</sub> emissions,  $T_{nonCO_2}$  is the estimated warming due to non-CO<sub>2</sub> forcing, and  $ESF$  is an estimate of the CO<sub>2</sub> released due to feedbacks unaccounted for in the calculation of TCRE. See Methods for details.

### Nitrogen limitation in CMIP7 ESMs

CMIP7 participating models CanESM6, EC-Earth-4, GISS-E3 and ICON-ESM<sup>3</sup> are expected to include nitrogen limitation of land carbon uptake, replacing ‘carbon only’ models CanESM5, EC-Earth-3, GISS-E2 and MPI-ESM1.2-LR respectively.

### References

1. Arora, V. K., Katavouta, A., Williams, R. G. *et al.* Carbon–concentration and carbon–climate feedbacks in CMIP6 models, and their comparison to CMIP5 models. *Biogeosciences* **17**, 4173–4222 (2020).
2. MacDougall, A. H., Frölicher, T. L., Jones, C. D. *et al.* Is there warming in the pipeline? A multi-model analysis of the Zero Emissions Commitment from CO<sub>2</sub>. *Biogeosciences* **17**, 2987–3016 (2020).
3. Jungclaus, J. H., Lorenz, S. J., Schmidt, H. *et al.* The ICON-Earth System Model version 1.0. *J. Adv. Model. Earth Syst.* **14**, e2021MS002813 (2022).
